# Supplementary material for: Moving towards an Understanding of the Role of the Inferior Fronto-Occipital Fasciculus in Language Processing
Source: MDPI journal article supplement (doi:10.3390/neurosci5010003), 2024-01-02
Supplement: s1 [file s1]

# Supplementary Material

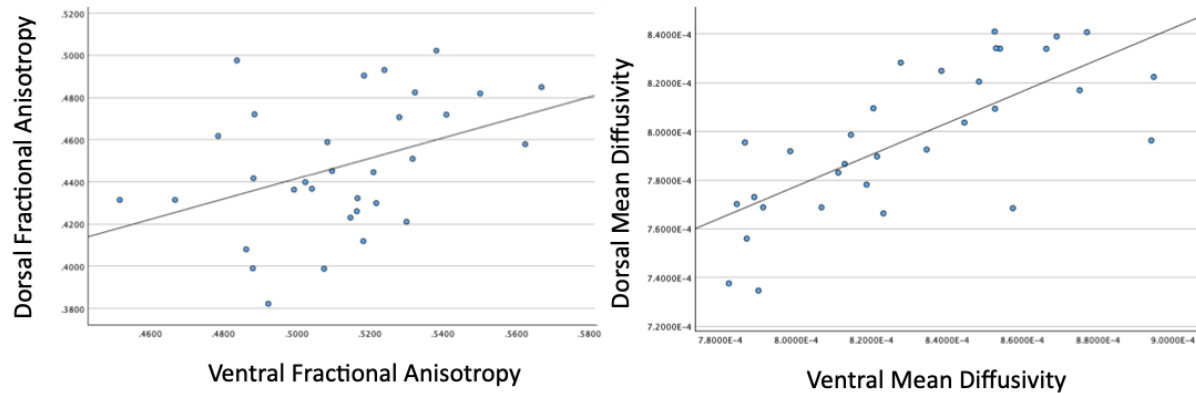

**Figure S1.** Scatterplot representing the relationship between fractional anisotropy (Left plot; Spearman's  $r = .410$ ,  $p = 0.02$ ) and mean diffusivity (Right plot; Spearman's  $r = .713$ ,  $p < 0.001$ ) in the dorsal and ventral segments of the IFOF.

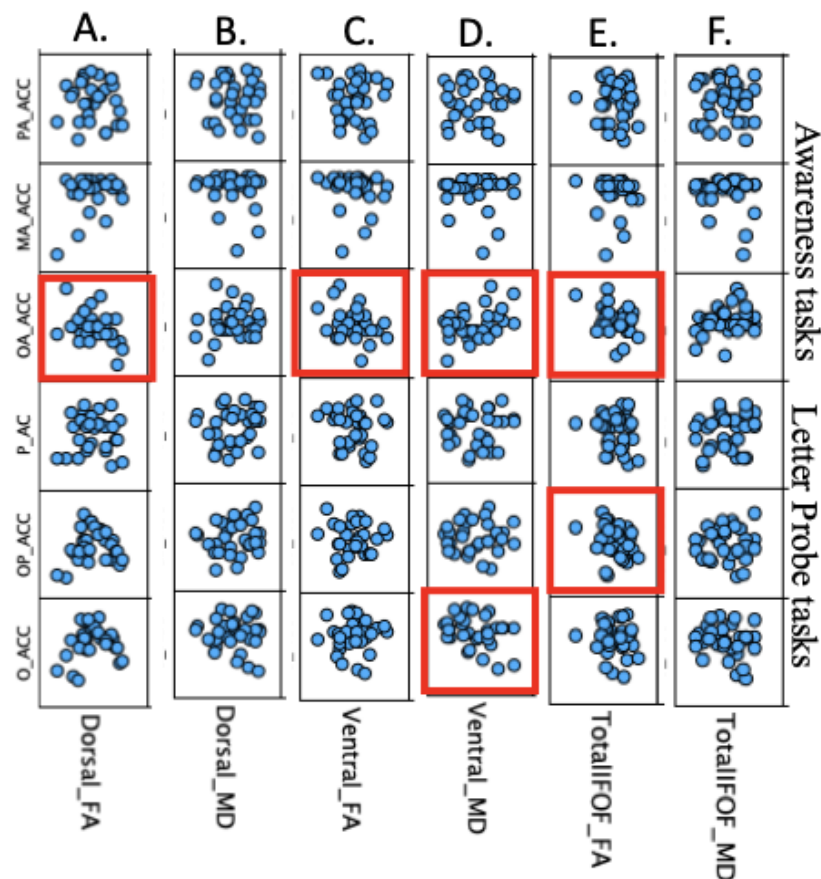

**Figure S2.** Scatterplots depicting the simple correlation between Dorsal (A & B), Ventral (C & D), and Total IFOF (E & F) and reading behaviour. Red boxes indicate significant correlations ( $p < 0.05$ , one-tailed).
